# Supplementary material for: Droplet collection efficiencies estimated from satellite retrievals constrain effective radiative forcing of aerosol-cloud interactions
Source: Copernicus journal article supplement (doi:10.5194/egusphere-2023-2161), 2023-11-06
Supplement: Supplementary file 1 [file egusphere-2023-2161-supplement.pdf]

1 **Table S1.** Overview of SLWC detection algorithms using MODIS and CloudSat. All profiles selected are ocean-only  
2 ('land\_flag' = 2) with a solar zenith angle between 0 and 60°. MOD06-1KM-AUX R05 (Platnick et al., 2017) and 2B-GEOPROF  
3 R05 (Marchand et al., 2008) were used for MODIS and CloudSat products, respectively. ECMWF-AUX was used for cloud top  
4 temperatures (main text Sect. 2.3). Throughout the SLWC analysis, observational MODIS COT values were derived from the  
5 from the combination of unique profiles between 'Cloud\_Optical\_Thickness' and 'Cloud\_Optical\_Thickness\_PCL' retrievals.  
6 Cloud top effective radius ( $R_e$ ) was derived from the combination of unique profiles between the 'Cloud\_Effective\_Radius' and  
7 'Cloud\_Effective\_Radius\_PCL' retrievals.

8

| Satellite Composite | A-Train Selection Criteria                                                                                                                                                                                                                                                                                                                                                                                                                                                                                                                                                                                                                                                                                                                                                                                                                                                                                                                                                                                                                                                                                                                  | E3SM-COSPV2.0 Selection Criteria                                                                                                                                                                                                                                                                                                                                                                                                                                                                                                                                                                                                                                                                                                                          | Diagnostic applications                                                                                                                                                                                                                         |
|---------------------|---------------------------------------------------------------------------------------------------------------------------------------------------------------------------------------------------------------------------------------------------------------------------------------------------------------------------------------------------------------------------------------------------------------------------------------------------------------------------------------------------------------------------------------------------------------------------------------------------------------------------------------------------------------------------------------------------------------------------------------------------------------------------------------------------------------------------------------------------------------------------------------------------------------------------------------------------------------------------------------------------------------------------------------------------------------------------------------------------------------------------------------------|-----------------------------------------------------------------------------------------------------------------------------------------------------------------------------------------------------------------------------------------------------------------------------------------------------------------------------------------------------------------------------------------------------------------------------------------------------------------------------------------------------------------------------------------------------------------------------------------------------------------------------------------------------------------------------------------------------------------------------------------------------------|-------------------------------------------------------------------------------------------------------------------------------------------------------------------------------------------------------------------------------------------------|
| MODIS and CloudSat  | <p>Based on the SLWC detection scheme described in Suzuki et al. (2010), with updated Cloud Optical Thickness (COT) threshold for consistency with COSPV2.0 WRDs:</p> <ul style="list-style-type: none"> <li>• CloudSat reflectivity profiles (2B-GEOPROF R05) are matched to MODIS cloud profiles (MOD06-1KM-AUX R05).</li> <li>• Cloud tops and bottom are determined where reflectivity &gt; -30 dBZ.</li> <li>• Single layer clouds are selected where the MODIS cloud layer flag ('Cloud_Multi_Layer_Flag') indicates one layer and COT &gt; 0.3.</li> <li>• MODIS cloud top pressure &gt; 500 hPa.</li> <li>• MODIS cloud top effective radius <math>5 \leq R_e \leq 30 \mu\text{m}</math></li> <li>• To select warm liquid clouds, the ECMWF-AUX temperature profiles were matched to the Cloud Profiling Radar (CPR) footprint.</li> <li>• Profiles are selected where the ECMWF-AUX cloud top temperature and MODIS cloud top temperature <math>\geq 273 \text{ K}</math>.</li> <li>• Profiles selected where CPR cloud mask ('cpr_cmask') values are <math>\geq 30</math>, indicating a good or strong echo with high-</li> </ul> | <p>Based on the WRDs originally implemented in COSPV2.0 (Michibata et al., 2019), with modifications described in main text Sect. 2.2. Subcolumns selected where:</p> <ul style="list-style-type: none"> <li>• MODIS liquid water path (LWP) &gt; 0 g/kg</li> <li>• MODIS liquid COT &gt; 0.3</li> <li>• MODIS Ice Water Path (IWP) <math>\leq 0 \text{ g/kg}</math></li> <li>• MODIS ice COT &lt; 0.3</li> <li>• MODIS liquid cloud top effective radius <math>5 \leq R_e \leq 30 \mu\text{m}</math></li> <li>• CloudSat reflectivity <math>\geq -30 \text{ dBZ}</math> for one or more contiguous layers</li> <li>• Temperature at cloud top (determined by CloudSat reflectivity threshold described above) <math>\geq 273 \text{ K}</math></li> </ul> | <ul style="list-style-type: none"> <li>• SLWC cloud fraction maps, binned by CloudSat reflectivity</li> <li>• CFODDs binned by MODIS cloud top <math>R_e</math></li> <li>• MODIS COT PDFs binned by MODIS cloud top <math>R_e</math></li> </ul> |

9

10 **Table S2.** PI base cloud state for the 12 sensitivity experiments. Dash (“-”) indicates the KK2000 coefficient value was  
 11 unchanged from the default E3SMv2 parameterization (equal to the “CNTL” simulation value).

| Name       | A        | $\alpha$ | $\beta$ | accre | PI LWP<br>(kg m <sup>-2</sup> ) | PI SLWC<br>Cloud<br>Fraction | PI<br>SWCRE<br>(W m <sup>-2</sup> ) |
|------------|----------|----------|---------|-------|---------------------------------|------------------------------|-------------------------------------|
| CNTL       | 3.05E+04 | 3.19     | -1.4    | 1.75  | 0.107                           | 0.052                        | -12.1                               |
| alpha01    | -        | 4.22     | -       | -     | 0.180                           | 0.049                        | -14.1                               |
| alpha02    | -        | 3        | -       | -     | 0.080                           | 0.052                        | -10.7                               |
| beta01     | -        | -        | -1      | -     | 0.087                           | 0.050                        | -10.4                               |
| beta02     | -        | -        | -1.79   | -     | 0.124                           | 0.052                        | -13.0                               |
| beta03     | -        | -        | -3.01   | -     | 0.161                           | 0.051                        | -14.1                               |
| acoef0.05x | 1.35E+03 | -        | -       | -     | 0.150                           | 0.052                        | -13.9                               |
| acoef5x    | 1.53E+05 | -        | -       | -     | 0.079                           | 0.050                        | -10.1                               |
| acoef10x   | 3.05E+05 | -        | -       | -     | 0.066                           | 0.047                        | -8.9                                |
| acoef50x   | 1.53E+06 | -        | -       | -     | 0.039                           | 0.034                        | -5.2                                |
| acoef100x  | 3.05E+06 | -        | -       | -     | 0.030                           | 0.026                        | -3.6                                |
| accre      | -        | -        | -       | 5     | 0.077                           | 0.049                        | -10.2                               |

12  
 13  
 14  
 15  
 16  
 17  
 18  
 19  
 20  
 21  
 22  
 23  
 24  
 25  
 26  
 27  
 28  
 29  
 30  
 31  
 32

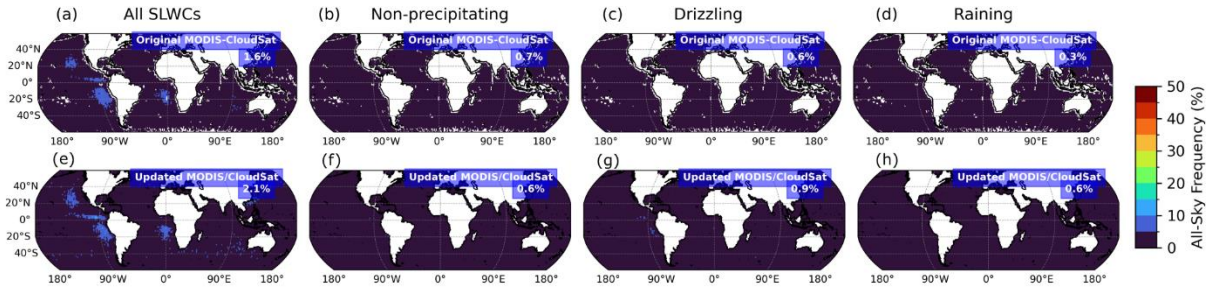

33

34 **Figure S1.** All-sky frequencies of total SLWCs June 2006 – Apr 2011, non-precipitating ( $Z_{max} < -15 \text{ dBZ}_e$ ), drizzling  
 35 ( $-15 \text{ dBZ}_e \leq Z_{max} < 0 \text{ dBZ}_e$ ) and raining ( $Z_{max} \geq 0 \text{ dBZ}_e$ ) ocean-only SLWCs according to original reference analysis of  
 36 MODIS and CloudSat observations (Michibata et al., 2019a, 2019b) (a-d), and updated reference MODIS and CloudSat analysis  
 37 (as in Fig. 1), but increasing the lower MODIS COT threshold from 0.3 to 15.

38

39

40

41

42

43

44

45

46

47

48

49

50

51

52

53

54

55

56

57

58

59

60

61

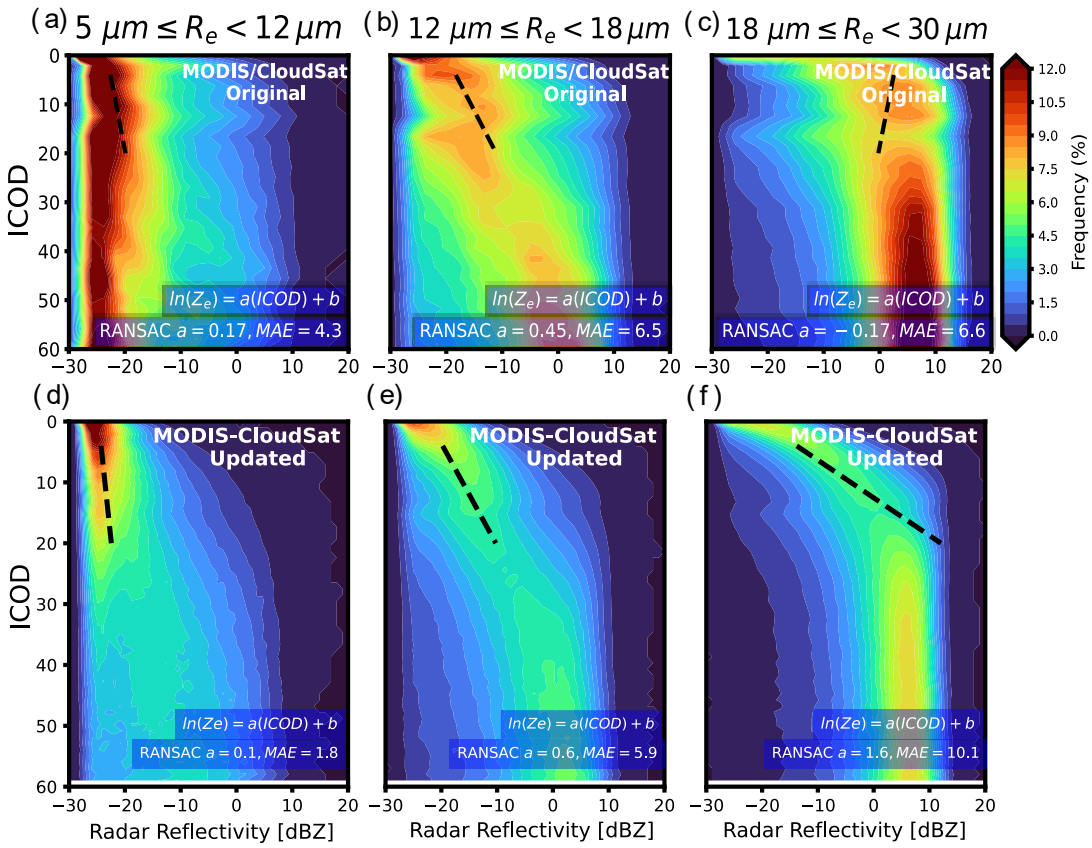

62

63 **Figure S2.** Contoured frequency by optical depth diagrams (CFODDs) for SLWCs June 2006 – April 2011 binned by MODIS  
 64 cloud top effective radius ( $R_e$ ) from original reference MODIS-CloudSat observations analysis (a-c) and updated reference  
 65 MODIS-CloudSat observations analysis (d-f) as in Fig. 2, but increasing the lower MODIS COT threshold from 0.3 to 15.  
 66 Random Sample Consensus (RANSAC) linear regressions were applied to the CFODD at  $4 \leq \text{ICOD} \leq 20$  to estimate droplet  
 67 collection efficiencies. RANSAC slopes and Median Absolute Error (MAE) values are shown in blue boxes.

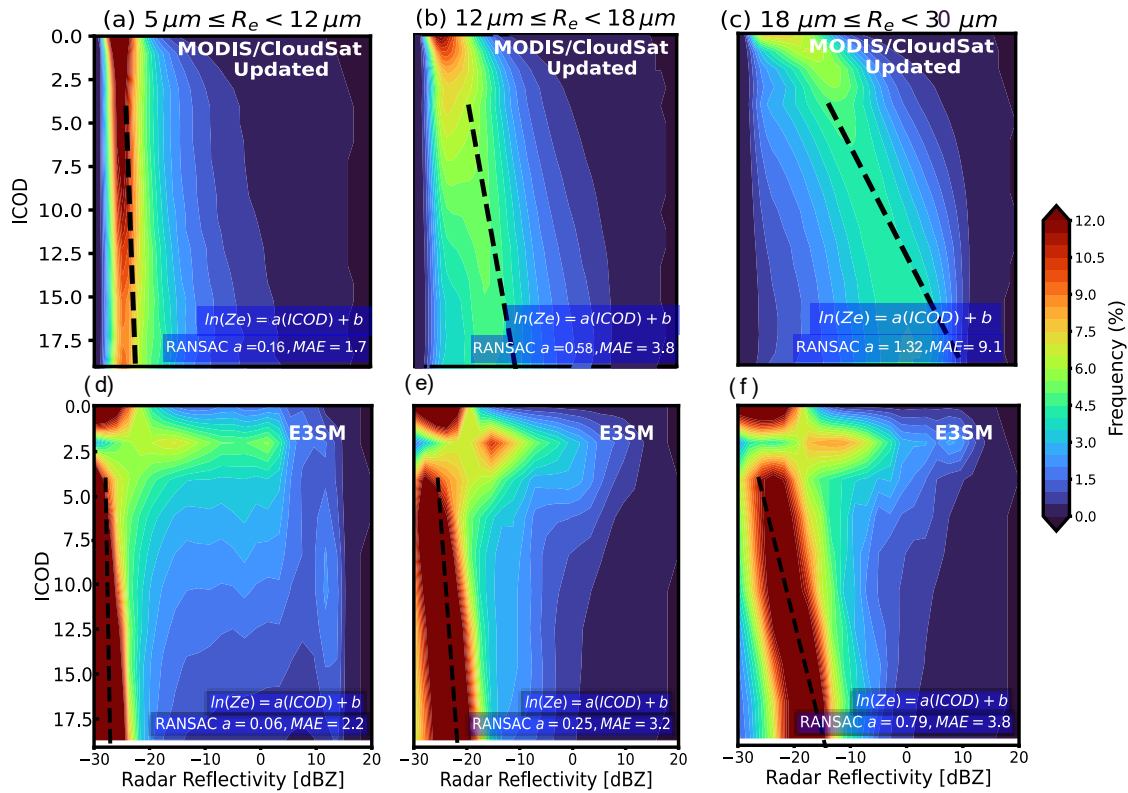

68

69 **Figure S3.** Contour frequency by optical depth diagrams (CFODDs) for subset of SLWCs with max CloudSat reflectivity < 20  
70 dBZ and COT < 20, June 2006 – April 2011 binned by MODIS cloud top effective radius ( $R_e$ ) from updated reference MODIS-  
71 CloudSat observations analysis (a-c) and the E3SMv2 simulation (d-f). CloudSat reflectivities are binned by MODIS in-cloud  
72 optical depth (ICOD) to construct CFODDs. Random Sample Consensus (RANSAC) linear regressions were applied to the  
73 CFODD at  $4 \leq \text{ICOD} \leq 20$  to estimate droplet collection efficiencies. RANSAC slopes and Median Absolute Error (MAE) values  
74 are shown in blue boxes. E3SM-COSP CFODDs shows discontinuity in CloudSat reflectivity frequencies near cloud top, and  
75 decreased droplet collection efficiencies compared to observations.

76

77

78

79

80

81

82

83

84

85

86

87

88  
89  
90  
91

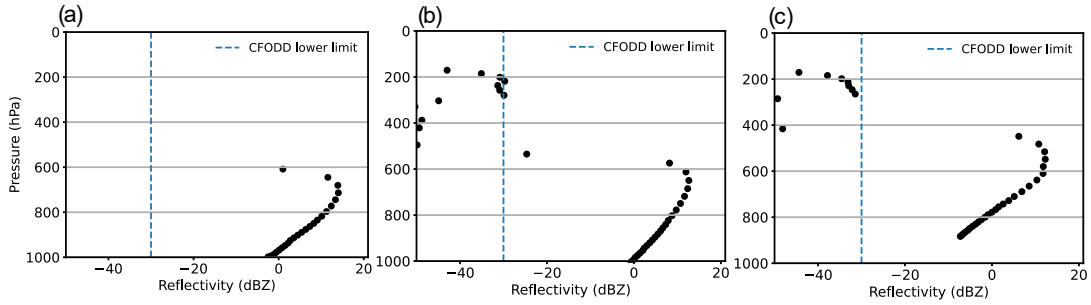

92

93 **Figure S4.** Example E3SMv2 SLWC reflectivity profiles from the CloudSat simulator output in COSPv2.0. E3SMv2 SLWCs  
94 exhibit reflectivity > 0 dBZ at cloud top with high frequency compared to MODIS-CloudSat observations (see Fig. 2, Sect. 3). A  
95 CloudSat ground-clutter mask that was implemented in the WRDs for improved comparison with observations is not shown here.

96  
97  
98  
99  
100  
101  
102  
103  
104  
105  
106

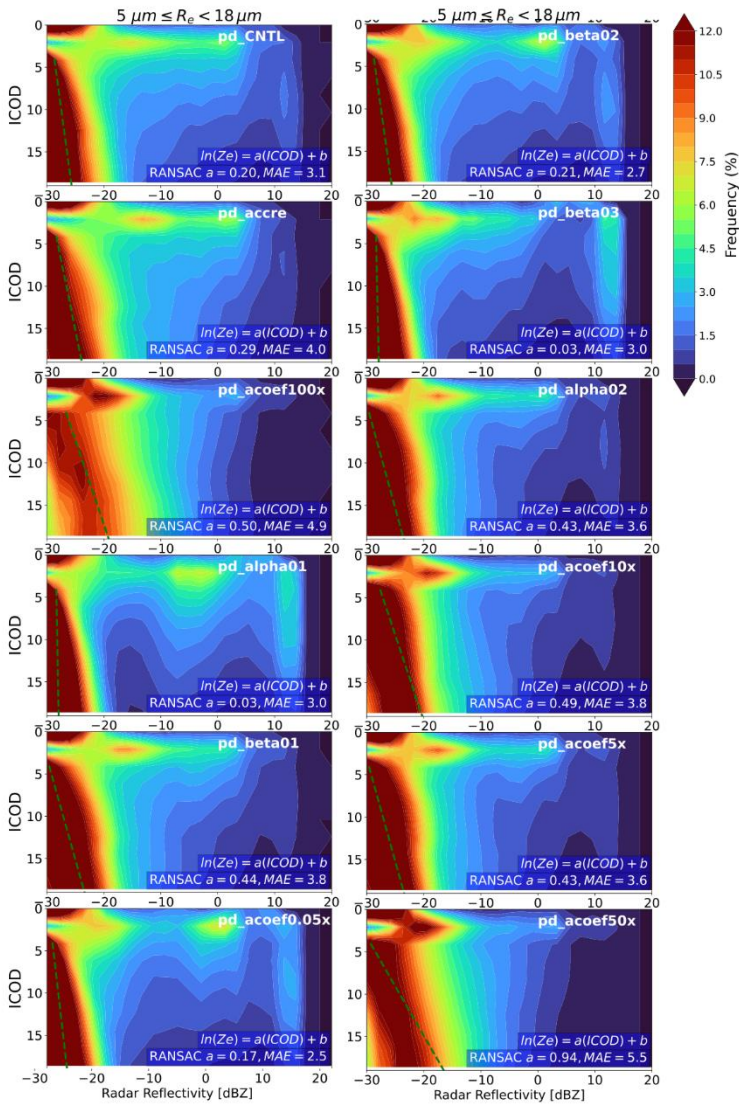

107

108 **Figure S5.** CFODDs for E3SMv2 PD simulations in 12 experiments featuring variations of the default E3SMv2 autoconversion  
 109 and accretion parameterizations (Table 1), for SLWCs with MODIS  $R_e$  between 5 and 18  $\mu\text{m}$  and COT between 4 and 20. RANSAC  
 110 linear regressions were applied to the CFODDs at  $4 \leq \text{ICOD} \leq 20$ . RANSAC slopes and MAE values are shown in blue boxes.

111

112

113

114

115

116

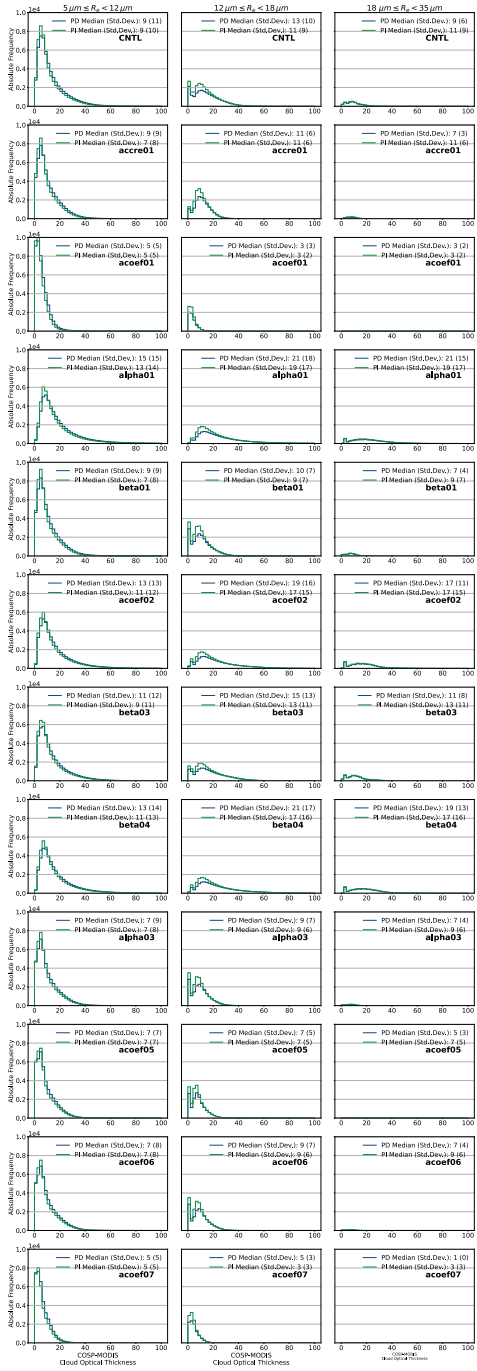

117

118 **Figure S6.** Absolute frequency of SLWCs in E3SMv2 in 12 warm rain process sensitivity experiments, binned by simulated  
 119 MODIS  $R_e$ . Blue and green PDFs indicate the PD and PI simulation results, respectively.

120

121

122



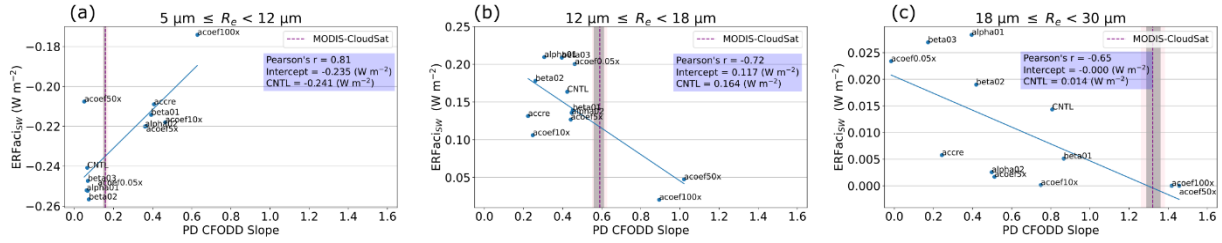

123

124 **Figure S7.** Linear regression between E3SMv2 ERFaci<sub>sw</sub> and CFODD slopes in 12 PD autoconversion and accretion sensitivity  
 125 experiments, binned by MODIS  $R_e$ . Results show that SLWCs in the small and medium  $R_e$  size bin contribute to ERFaci<sub>sw</sub> in  
 126 equal magnitude but opposite sign, and SLWCs with large  $R_e$  make a relatively small positive contribution to ERFaci<sub>sw</sub>  
 127 compared to the small or medium  $R_e$  populations. The positive correlation in the small  $R_e$  size bin indicates that increasing  
 128 droplet collection efficiency weakens ERFaci<sub>sw</sub> for this SLWC subset. The positive ERFaci<sub>sw</sub> values that diminish with  
 129 increasing CFODD slope in the medium and large  $R_e$  size bins indicate that increased aerosol yields decreased small and medium  
 130  $R_e$  SLWC cloud fraction (see Figs. S12-S13), but that increased droplet collection efficiencies oppose the aerosol effect. Grey  
 131 and pink shaded regions indicate the 68 and 98% confidence intervals for the MODIS-CloudSat CFODD slope, respectively.  
 132 Labels indicate the sensitivity experiment names (Table 1).

133

134

135

136

137

138

139

140

141

142

143

144

145

146

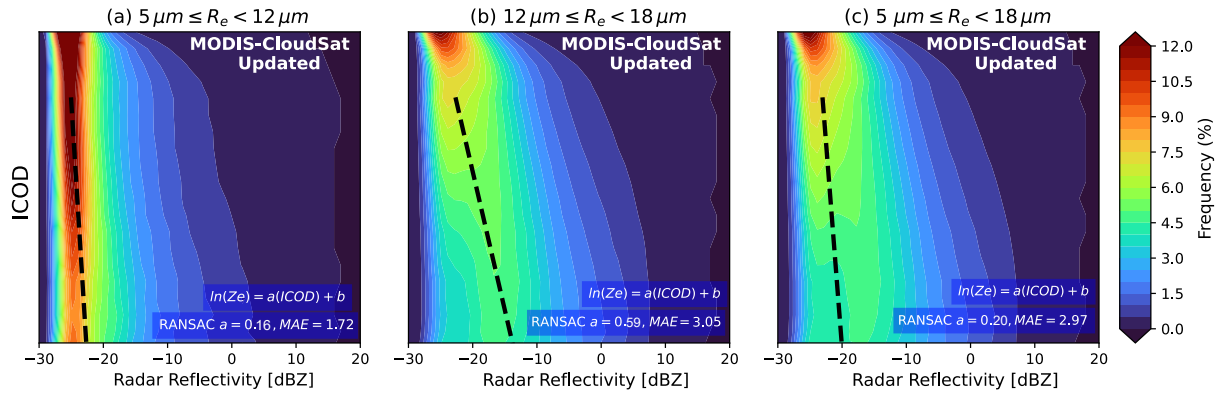

147

148 **Figure S8.** CFODDs as in Fig. S3 for subset of SLWCs with max CloudSat reflectivity < 20 dBZ and COT < 20, June 2006 –  
 149 April 2011 binned by MODIS  $R_e$  from updated reference MODIS-CloudSat observations analysis (a-c), but with combined  
 150 “small” and “medium”  $R_e$  SLWCs in (c). CloudSat reflectivities are binned by MODIS ICOD to construct CFODDs. Random  
 151 Sample Consensus (RANSAC) linear regressions were applied to the CFODD at  $4 \leq \text{ICOD} \leq 20$  to estimate droplet collection  
 152 efficiencies. RANSAC slopes and Median Absolute Error (MAE) values are shown in blue boxes.

153

154

155

156

157

158

159

160

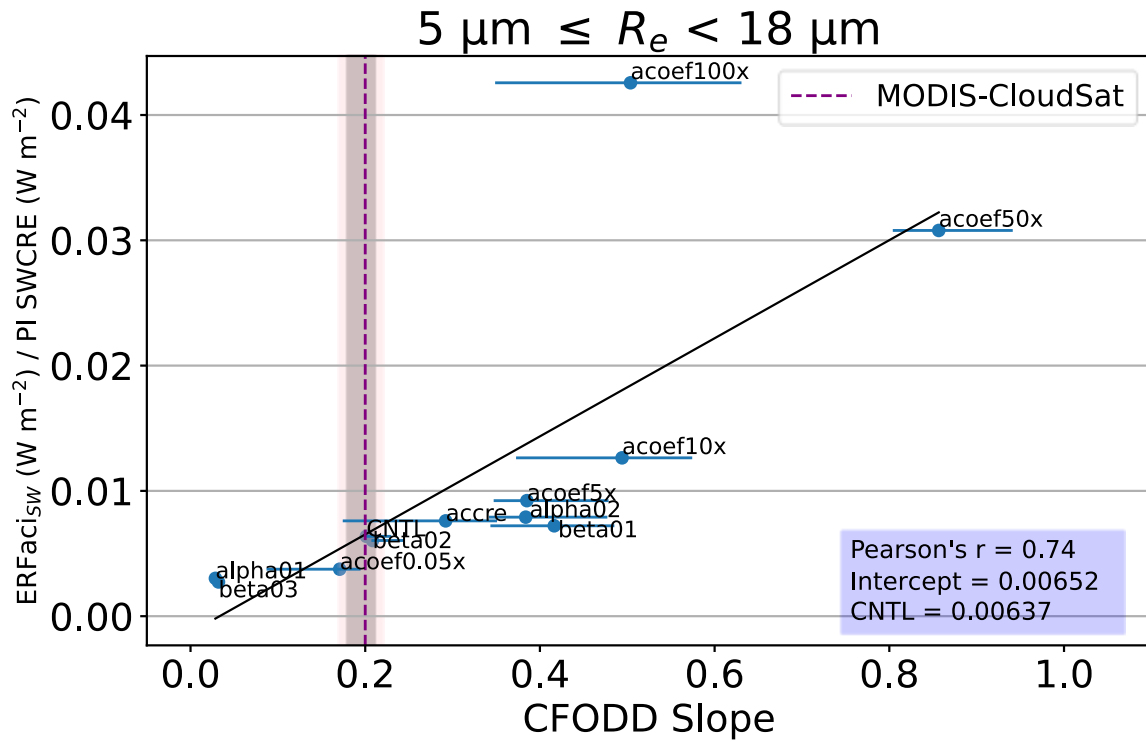

161

162 **Figure S9.** Linear regression between E3SMv2 ERFaci<sub>sw</sub> normalized by SWCRE and CFODD slopes in 12 PD autoconversion  
 163 and accretion sensitivity experiments, generated from SLWCs with MODIS  $R_e$  between 5 and 18  $\mu\text{m}$ . Error bars represent 1-  
 164 sigma error estimated from RANSAC-fit bootstrapping (Sect. 2). Grey and pink shaded regions indicate the 68 and 98%  
 165 confidence intervals for the MODIS-CloudSat CFODD slope, respectively. Labels indicate the sensitivity experiment names  
 166 (Table 1).

167

168

169

170

171

172

173

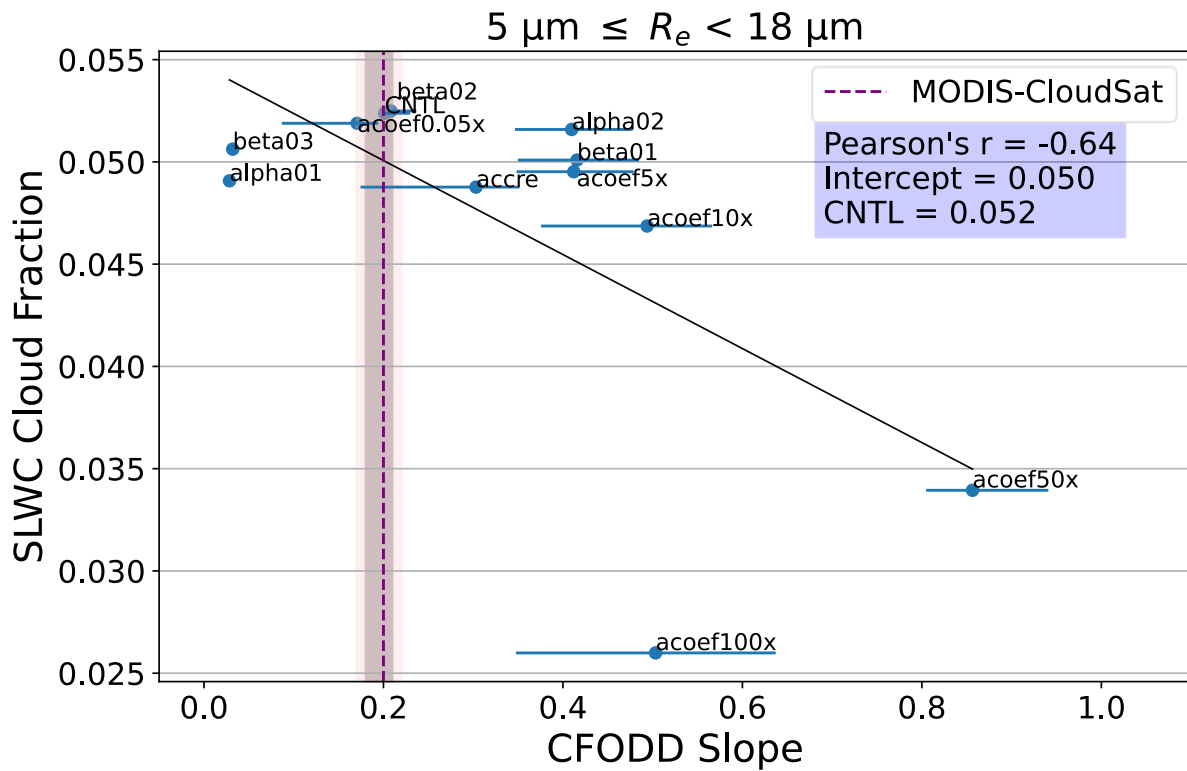

174

175 **Figure S10.** Linear regression between PI E3SMv2 SLWC cloud fraction and PD CFODD slopes in 12 autoconversion and  
 176 accretion sensitivity experiments, generated from SLWCs with MODIS  $R_e$  between 5 and 18  $\mu\text{m}$ . Error bars represent 1-sigma  
 177 error estimated from RANSAC-fit bootstrapping (Sect. 2). Grey and pink shaded regions indicate the 68 and 98% confidence  
 178 intervals for the MODIS-CloudSat CFODD slope, respectively. Labels indicate the sensitivity experiment names (Table 1).

179

180

181

182

183

184

185

186

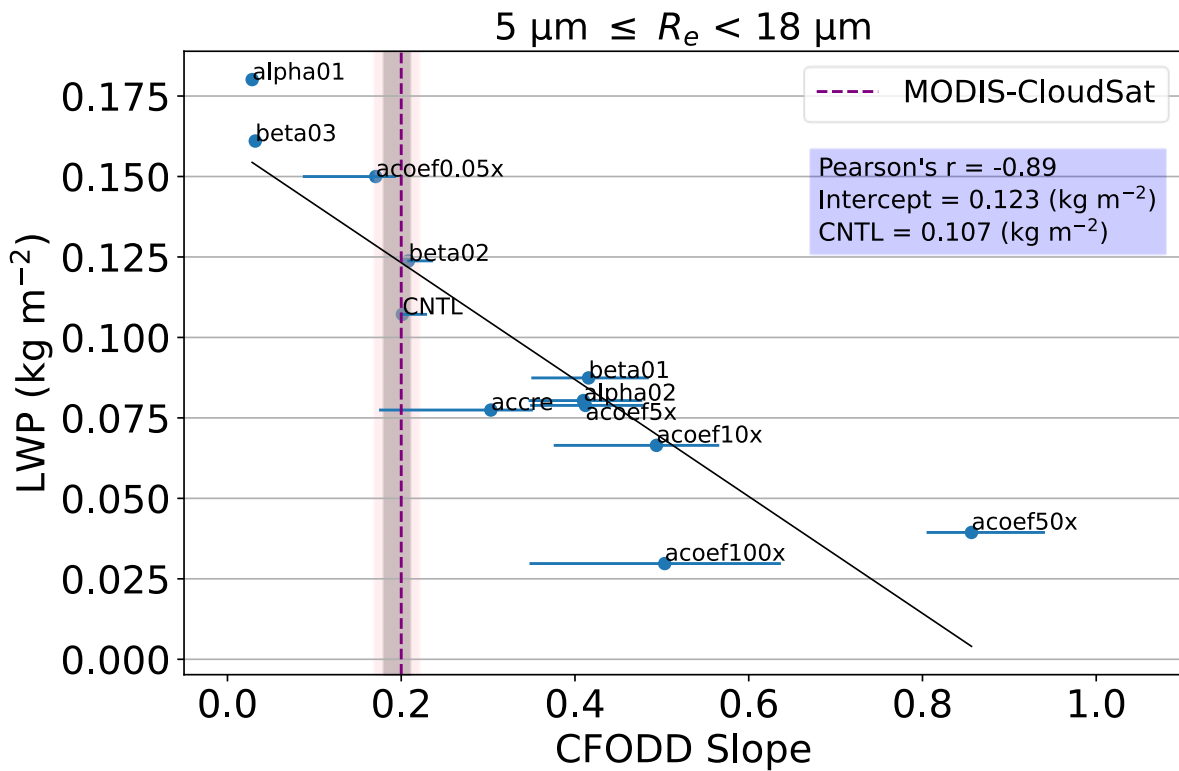

187

188 **Figure S11.** Linear regression between PI E3SMv2 SLWC LWP and PD CFODD slopes in 12 autoconversion and accretion  
 189 sensitivity experiments, generated from SLWCs with MODIS  $R_e$  between 5 and 18  $\mu\text{m}$ . Error bars represent 1-sigma error  
 190 estimated from RANSAC-fit bootstrapping (Sect. 2). Grey and pink shaded regions indicate the 68 and 98% confidence intervals  
 191 for the MODIS-CloudSat CFODD slope, respectively. Labels indicate the sensitivity experiment names (Table 1).

192

193

194

195

196

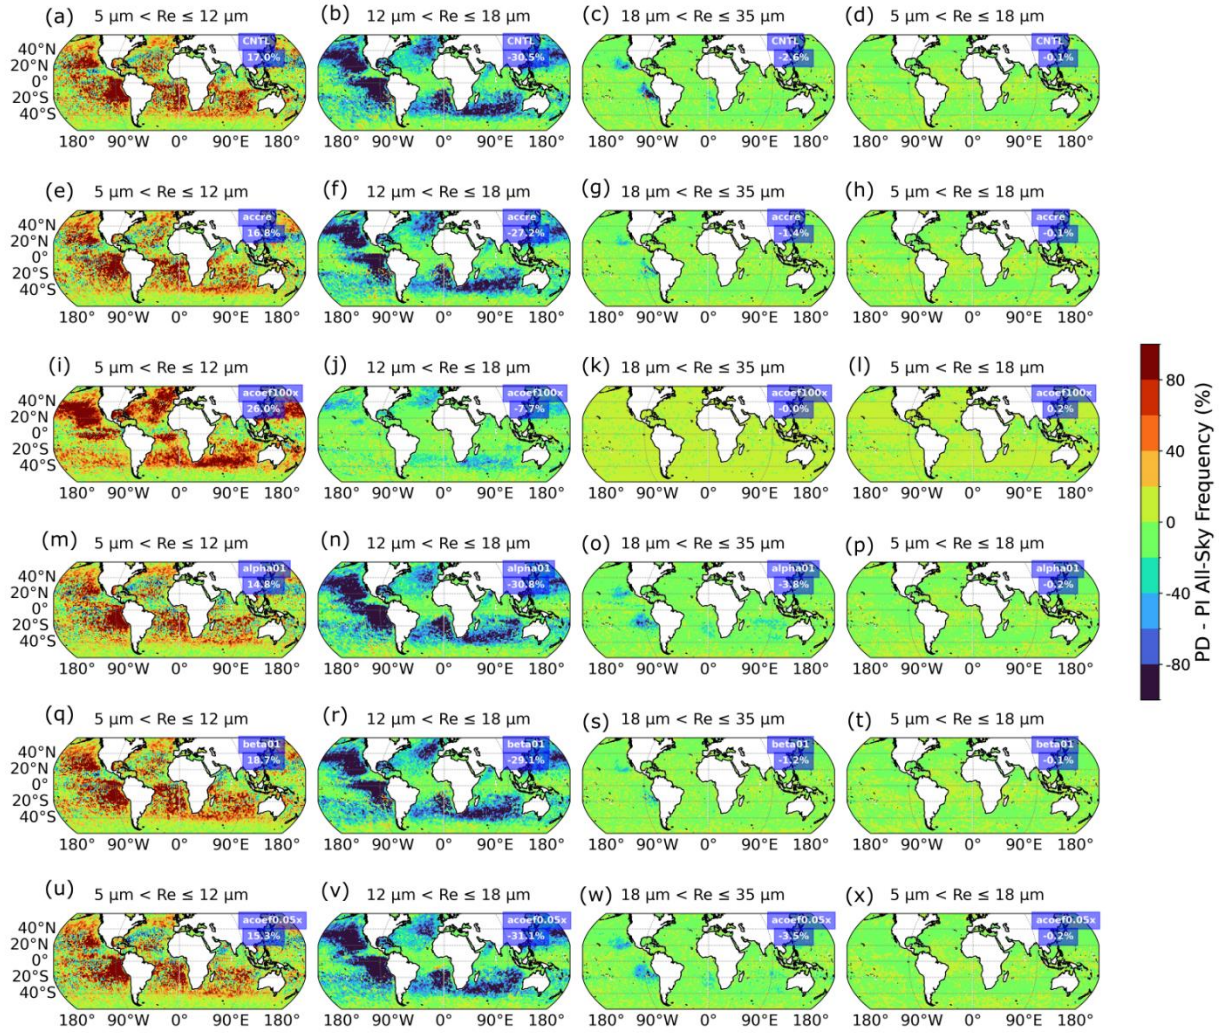

197

198

199 **Figure S12.** Difference between PD and PI all-sky SLWC cloud fraction in 6 of 12 warm rain process sensitivity experiments,  
 200 binned by simulated MODIS Re. Labels indicate experiment name (Table 1) and global mean cloud fraction difference.

201

202

203

204

205

206

207

208



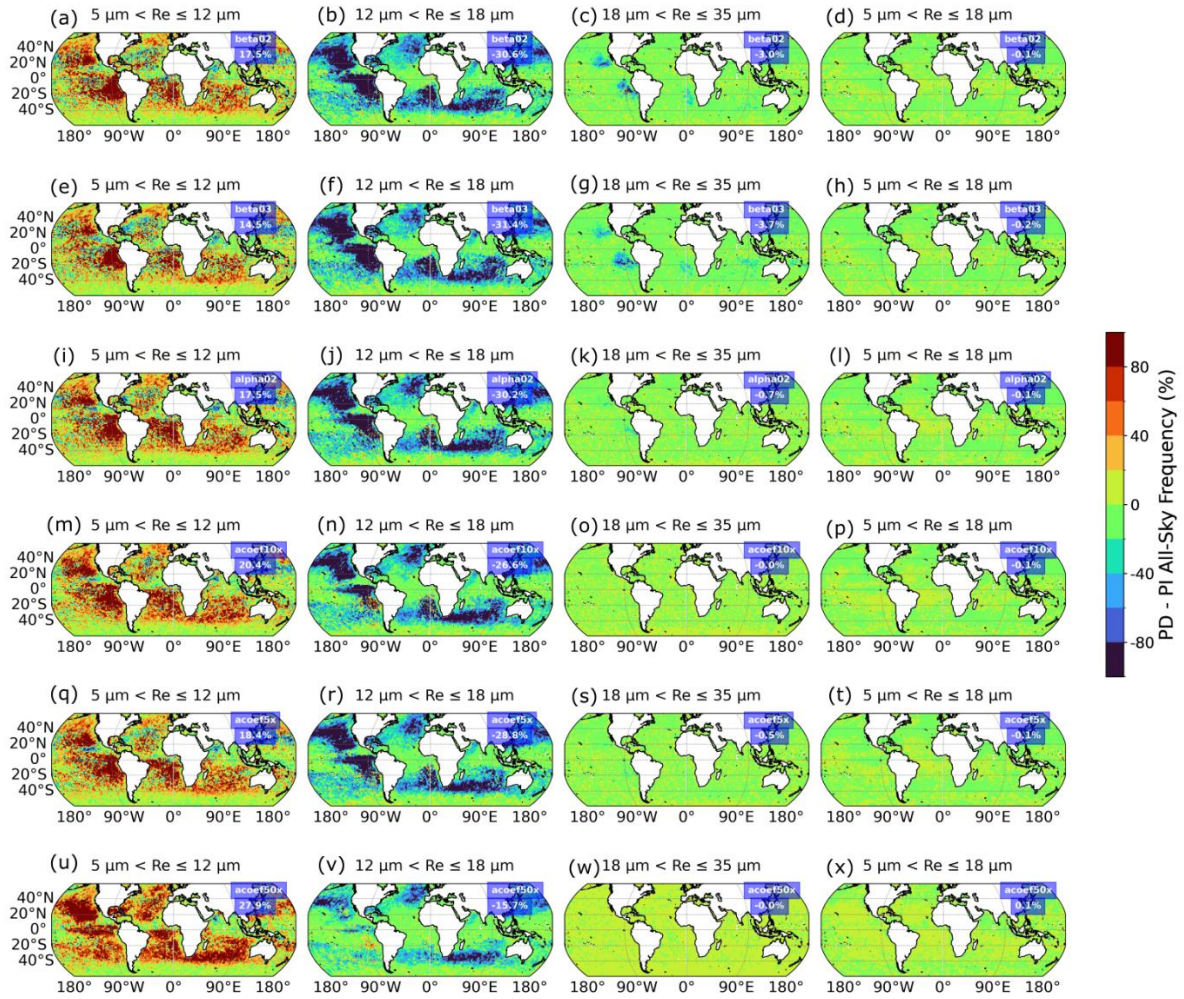

209

210

211 **Figure S13.** Difference between PD and PI all-sky SLWC cloud fraction in 6 of 12 warm rain process sensitivity experiments,  
 212 binned by simulated MODIS  $R_e$ . Labels indicate experiment name (Table 1) and global mean cloud fraction difference.

213

214

215

216

217

218

219

220

221

222

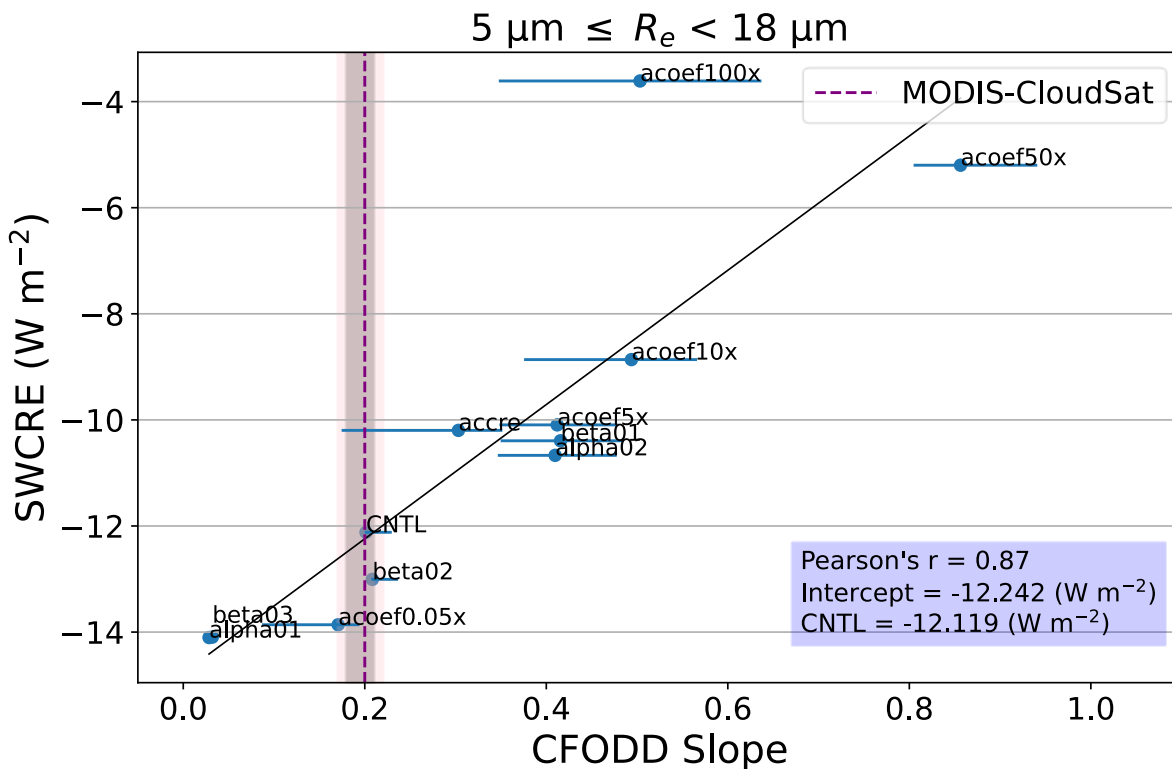

223

224 **Figure S14.** Linear regression between PI E3SMv2 SLWC SWCRE and PD CFODD slopes in 12 autoconversion and accretion  
 225 sensitivity experiments, generated from SLWCs with MODIS  $R_e$  between 5 and 18  $\mu\text{m}$ . Error bars represent 1-sigma error  
 226 estimated from RANSAC-fit bootstrapping (Sect. 2). Grey and pink shaded regions indicate the 68 and 98% confidence intervals  
 227 for the MODIS-CloudSat CFODD slope, respectively. Labels indicate the sensitivity experiment names (Table 1).

228

229

230

231

232

233

234



235 References

- 236 Mace, G. G., & Zhang, Q. (2014). The CloudSat radar-lidar geometrical profile product (RL-GeoProf): Updates,  
237 improvements, and selected results. *Journal of Geophysical Research: Atmospheres*, *119*(15), 9441–9462.  
238 <https://doi.org/https://doi.org/10.1002/2013JD021374>
- 239 Marchand, R., Mace, G. G., Ackerman, T., & Stephens, G. (2008). Hydrometeor Detection Using Cloudsat—An  
240 Earth-Orbiting 94-GHz Cloud Radar. *Journal of Atmospheric and Oceanic Technology*, *25*(4), 519–533.  
241 <https://doi.org/10.1175/2007JTECHA1006.1>
- 242 Michibata, T., Suzuki, K., Ogura, T., & Jing, X. (2019a). Incorporation of inline warm rain diagnostics into the  
243 COSP2 satellite simulator for process-oriented model evaluation. *Geoscientific Model Development*, *12*(10),  
244 4297–4307. <https://doi.org/10.5194/gmd-12-4297-2019>
- 245 Michibata, T., Suzuki, K., Ogura, T., & Jing, X. (2019b). Incorporation of inline warm rain diagnostics into the  
246 COSP2 satellite simulator for process-oriented model evaluation. *Geoscientific Model Development*, *12*(10),  
247 4297–4307. <https://doi.org/10.5194/gmd-12-4297-2019>
- 248 Platnick, S., Meyer, K. G., King, M. D., Wind, G., Amarasinghe, N., Marchant, B., Arnold, G. T., Zhang, Z.,  
249 Hubanks, P. A., Holz, R. E., Yang, P., Ridgway, W. L., & Riedi, J. (2017). The MODIS Cloud Optical and  
250 Microphysical Products: Collection 6 Updates and Examples From Terra and Aqua. *IEEE Transactions on*  
251 *Geoscience and Remote Sensing*, *55*(1), 502–525. <https://doi.org/10.1109/TGRS.2016.2610522>
- 252 Suzuki, K., Nakajima, T. Y., & Stephens, G. L. (2010). Particle Growth and Drop Collection Efficiency of Warm  
253 Clouds as Inferred from Joint CloudSat and MODIS Observations. *Journal of the Atmospheric Sciences*,  
254 *67*(9), 3019–3032. <https://doi.org/10.1175/2010JAS3463.1>

255
